# Supplementary material
Source: Springer Nature journal article supplement (https://www.springermedizin.de/resource/supplementary/13023_2012_485_MOESM1_ESM.pdf/9642380)

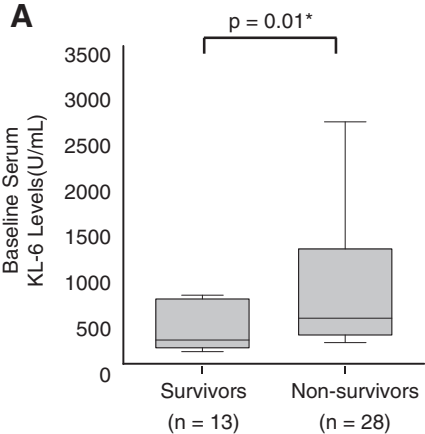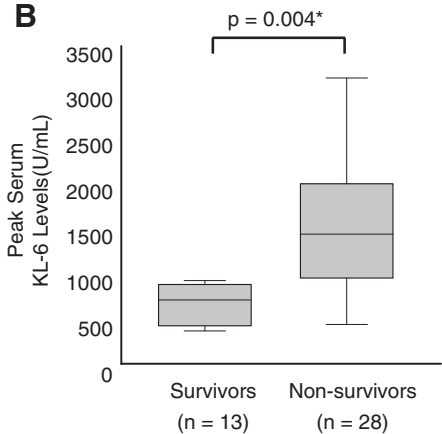

Supplement: MOESM1 [file 9642380]
